# Supplementary material for: Selective hydroformylation of N-allylacetamide in an inverted aqueous two-phase catalytic system, enabling a short synthesis of melatonin
Source: Royal Society of Chemistry journal article supplement (doi:10.1039/b003715j), 2000-01-01
Supplement: b003715j.doc [file b003715j.doc]

**Supporting information:**

All catalytic experiments and syntheses were done under an inert nitrogen atmosphere. The solvents (p.a.) were used as received. Distilled water was saturated with nitrogen before use. Tppts[[1]](#endnote-2) and 4,5-bisdiphenylphosphino-9,9-dimethylxanthene (Xantphos)[[2]](#endnote-3) were prepared according to literature procedures. All other chemicals were commercially available. Rh-analyses were performed on a Perkin Elmer 5100Pc Atomic Absorption Spectrometer

# Single phase hydroformylation of N-allylacetamide

1.0 ml of a freshly prepared 0.010 M solution of Rh(acac)(CO)2 (0.010 mmol) in MeOH was added to a solution of the ligand in the desired solvent (or solvent mixture). N-allylacetamide and standard (pentaerythritol for reactions in aqueous media, n-butanol for reactions in organic media) were added and the combined solution was transferred into a 300 ml Hasteloy C Parr autoclave. The nitrogen atmosphere was replaced by a mixture of H2 and CO (1:1) and the autoclave was swiftly heated to reaction temperature (within 8 minutes). When the temperature was stabilised, the pressure was adjusted and a sample was taken (t=0). Samples were taken at regular time intervals, and the pressure was maintained constant by adding the H2/CO mixture. The samples were immediately analysed by HPLC (Phenomenex organic acid column, eluent: 0.01 M trifluoroacetic acid in water). The conversion, yield and selectivities were calculated relative to the standard. The products were identified by 1H-NMR and LC/MS. The linear aldehyde, 4-acetamidobutanal, was also identified by HPLC by comparing the retention time with the compound prepared in situ by combining 4-aminobutyraldehyde diethylacetal with 1 equivalent of acetic anhydride.

# Hydroformylation of N-allylacetamide in an inverted aqueous biphasic system

25 mmol N-allylacetamide and pentaerythritol (4 mmol, internal standard) were dissolved in water in a 300 ml Hasteloy C Parr autoclave. A freshly prepared solution of Rh(acac)(CO)2 in toluene and a solution of the ligand in toluene were combined and transferred into the autoclave. Further on, the same procedure was followed as described for the single phase hydroformylation reactions. Vigorous stirring (1000 rpm) afforded representative samples from the biphasic reaction mixture. The aqueous layers of the samples were analysed by HPLC. Since the concentration of the substrate and the products in the organic layers were negligible, the organic layers were disregarded.

## Partition coefficient determination in a toluene/water (1:1) mixture at r.t.

5 ml of an aqueous solution of N-allylacetamide (296.0 mM), 4-acetamidobutanal (155.2 mM) and 3-acetamido-2-methylpropanal (88.8 mM), was extracted with 5 ml toluene at room temperature. The water layer was again analysed with HPLC and the following concentrations were measured: N-allylacetamide (281.8 mM), 4-acetamidobutanal (151.3 mM) and 3-acetamido-2-methylpropanal (87.0 mM). Partition coefficients in the aqueous layer: N-allylacetamide: 0.952, 4-acetamidobutanal: 0.975 and 3-acetamido-2-methylpropanal: 0.980.

# Recycling experiments

12.9 mg (0.050 mmol) Rh(acac)(CO)2 was dissolved in toluene and combined with a solution of 144.5 mg (0.250 mmol) Xantphos in toluene. The volume was adjusted to 115 ml by adding toluene and the solution was transferred into a 300 ml Hasteloy C Parr autoclave. 50 ml of a solution of N-allylacetamide (0.512 M, 25.6 mmol) and pentaerythritol (0.079 M, 3.97 mmol, standard) were added and the experiment was carried out as described above for the two-phase hydroformylation experiments, without taking samples. Reaction conditions: 70°C, 10 bar H2/CO (1:1), 1000 rpm, 22 hrs. After the reaction the autoclave was immediately cooled down to r.t. and the reactant gasses were vented. The aqueous layer was removed with a syringe, a new aqueous solution of the substrate (50 ml) was added and the experiment was repeated. Results:

| Run | Yield (%) | l/b ratio | [Rh] a (mg/l) |
| --- | --- | --- | --- |
| 1 | 95.3 | 19.6 | 0.10 |
| 2 | 94.8 | 19.9 | 0.06 |
| 3 | 93.5 | 19.7 | 0.07 |
| 4 | 95.5 | 20.1 | 0.03 |
| 5 | 95.3 | 19.7 | 0.14 |

a [Rh] in the aqueous layer, determined with AAS (detection limit 0.01 mg/l)

# A one-pot synthesis of N-acetyl-5-methoxytryptamine (melatonin)

1.59 g allylamine (28.0 mmol) was added drop wise to 2.86 g acetic anhydride (28.0 mmol) at 0-5°C. After the addition the mixture was stirred at room temperature for 5 minutes. Water was added, the volume was adjusted to 50 ml and the mixture was transferred to a 300 ml Hasteloy C Parr autoclave which contained the catalyst precursor solution prepared form Rh(acac)(CO)2 (0.050 mmol) and Xantphos (0.250 mmol) in 100 ml toluene. The hydroformylation was carried out as described above for the inverted two phase system. Reaction conditions: 10 bar H2/CO, 70°C, 1000 rpm, 30 hrs. The autoclave was cooled to r.t. and the reactant gasses were vented. The aqueous layer was separated and the organic layer was washed with water. 50 ml of the combined aqueous layers, containing 11.5 mmol 4-acetamidobutanal and 0.5 mmol 3-acetamido-2-methylpropanal, was transferred under nitrogen to a 100 ml three neck flask and 1.75 g (10.0 mmol) 4-methoxyphenylhydrazine (HCl salt) and 2.0 ml acetic acid (96%) were added. The purple solution was rapidly heated to reflux temperature and stirring was maintained for 10 minutes. The mixture was cooled down on ice, neutralised with NaHCO3 and the product was extracted with ethylacetate (3x100ml). The organic layers were dried over MgSO4, filtered, combined and evaporated. Purification by flash collumn chromatography (10 cm silica, ethylacetate) and recrystallisation from toluene afforded 1.01 g (44%) N-acetyl-5-methoxytryptamine as yellowish crystals. The 1H- and 13C-NMR spectra, melting point (117°C, uncorrected) and TLC retention times (silica/ethylacetate, Rf: 0.22) were consistent with those of the authentic compound.

Reaction profile of exp.2 (Table 1):

Reaction profile of exp. 6 (Table 1):

Reaction profile of exp. 8 (Table 1):

1. [?] W.A. Herrmann, C.W. Kohlpaintner, *Inorg. Synth.*, **1998**, *32*, 8 [↑](#endnote-ref-2)
2. [?] M. Kranenburg, Y.E.M. van der Burgt, P.C.J. Kamer, P.W.M.N. van Leeuwen, K. Goubitz, J. Fraanje, *Organometallics*, **1995**, *14*, 3081 [↑](#endnote-ref-3)
